# Supplementary material
Source: Springer Nature journal article supplement (https://www.springermedizin.de/resource/supplementary/10194_2013_585_MOESM1_ESM.pdf/9422724)
Supplement: MOESM1 [file 9422724]

## Enrollment

Assessed for eligibility (n=24)

Excluded (n=4)

- ◆ Difficult follow up (n=2)
- ◆ Withdrew consent (n=1)
- ◆ Didn't complete questionnaire (n=1)

Randomized (n=20)

## Allocation

Allocated to Botulinum toxin (n=10)

Allocated to Placebo (n=10)

## Follow-Up

12 weeks

12 weeks
